# Supplementary material for: Discrete- vs. Continuous-Time Modeling of Unequally Spaced Experience Sampling Method Data
Source: PubMed Central journal article supplement (PMC5655034; doi:10.3389/fpsyg.2017.01849), 2017-10-20

Appendix

Simulation results when intervals shorter than 1/6th of a block were prohibited

Figure A1. Absolute and relative bias for each model implementation and each true  $\varphi$  in the univariate simulation with one very long time series and a minimum interval length of 15 minutes (1/6th of a block). Each line represents a model implementation, and on the X-axis we have the true values of  $\varphi$ .

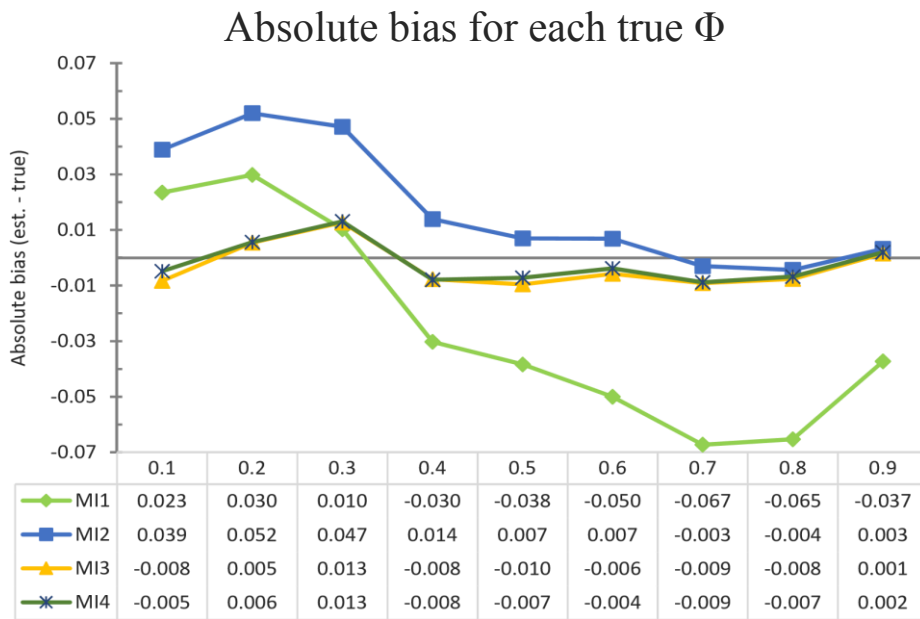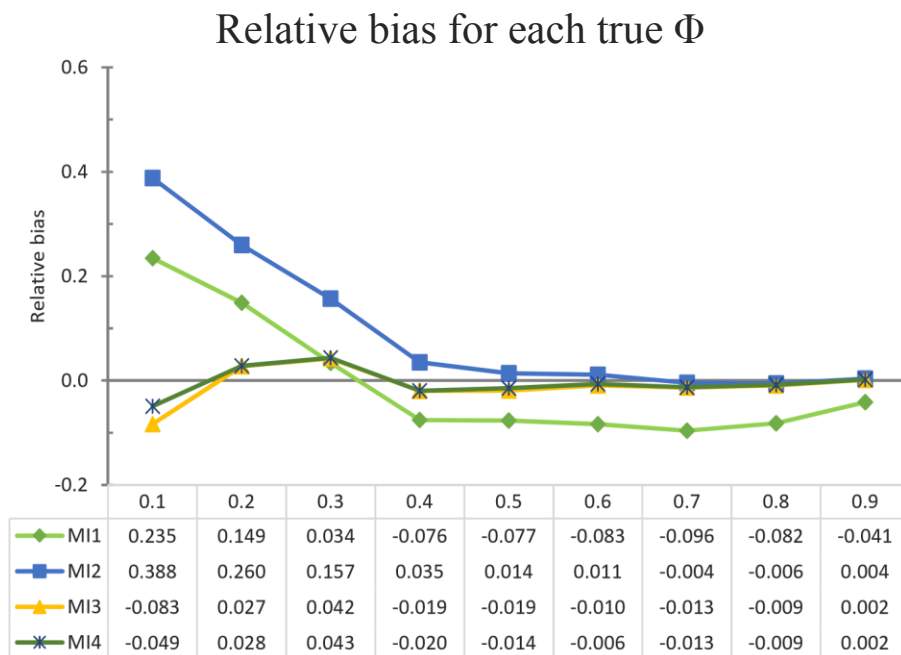

Figure A2 Median absolute and relative estimation error for each model implementation over one thousand shorter univariate time series with a minimum interval length of 15 minutes (1/6th of a block). Each line represents a model implementation, and on the X-axis we have the nine different true values of  $\varphi$ .

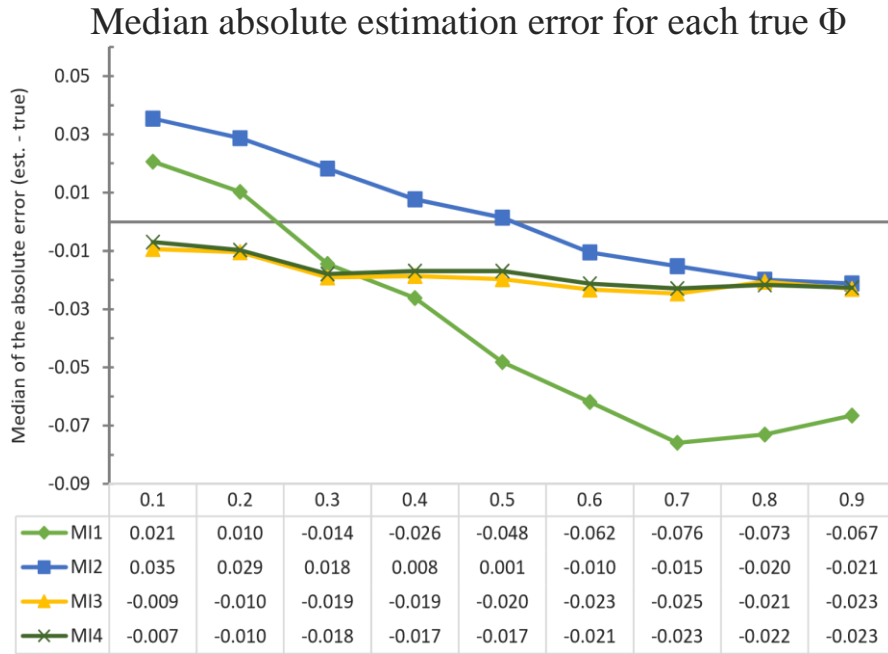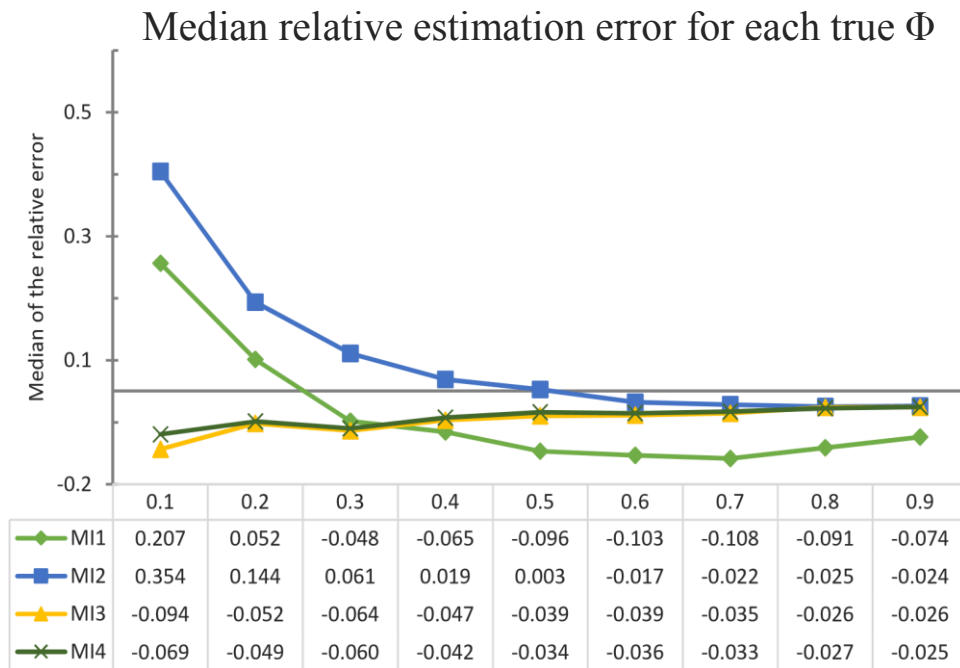

Figure A3 Median absolute and relative estimation error for each model implementation in the bivariate simulation with one very long time series and a minimum interval length of 15 minutes (1/6th of a block). In this graph, each stacked bar represents a model implementation and each color represents a different element of  $\Phi$ . It can be seen that MI 1 and especially MI 2 have a greater total amount of bias (longer bars) than MI 3 and 4, especially when considering the *relative* bias. MI 2 stands out particularly because of its large positive bias in both of the autocorrelations.

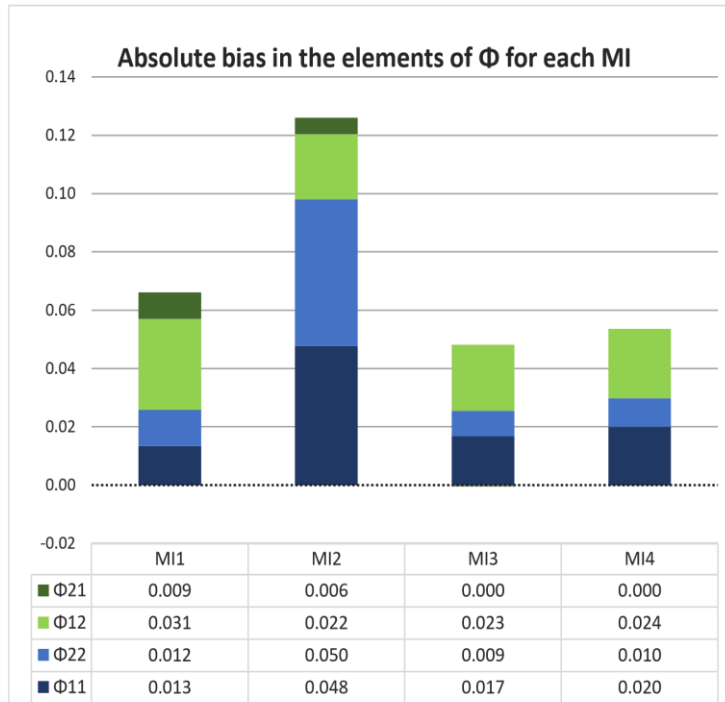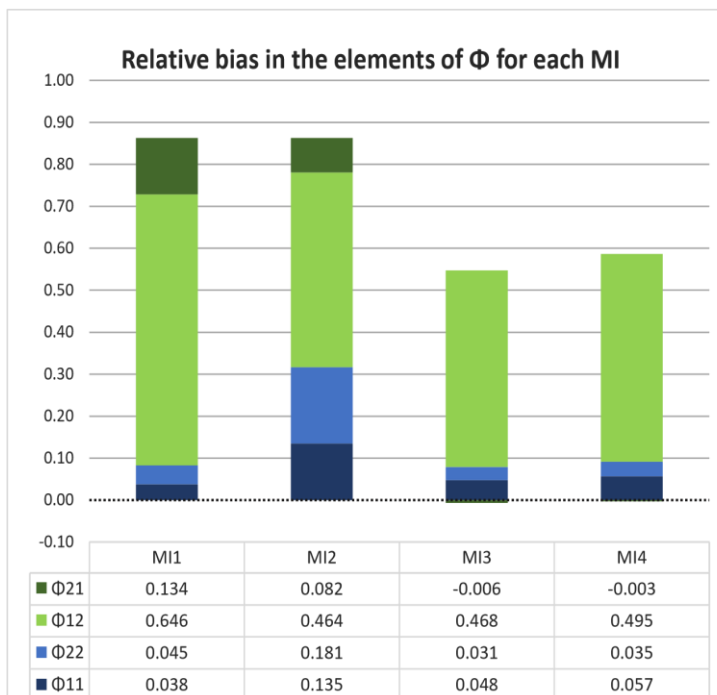

Figure A4 Median absolute and relative estimation error for each model implementation over one thousand shorter bivariate time series with a minimum interval length of 15 minutes ( $\frac{1}{60}$ th of a block). Under these conditions, none of the model implementations clearly outperforms the others in terms of the total amount of (absolute or relative) estimation error in  $\Phi$ . However, MI 2 again stands out because it is the only MI which overestimates the autocorrelations.

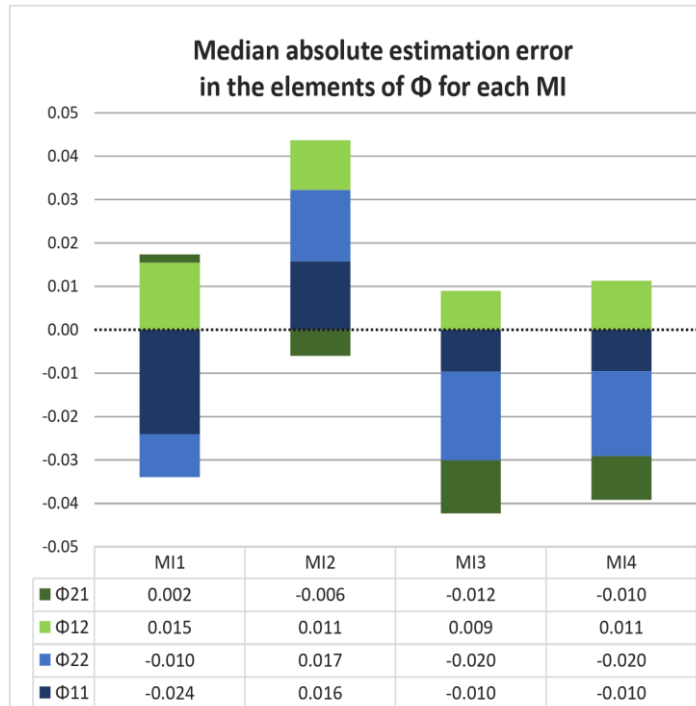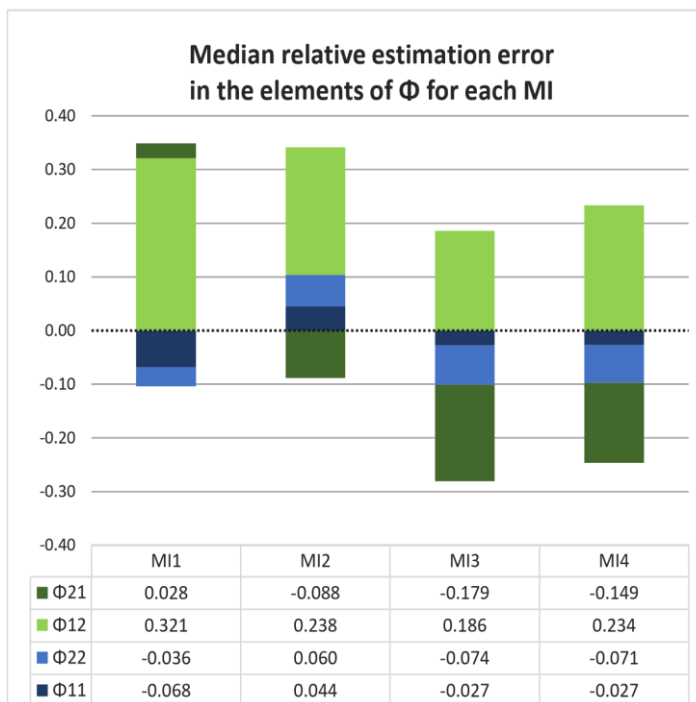

Supplement: DataSheet1.pdf [file DataSheet1.pdf]
